# Supplementary material
Source: MDPI journal article supplement (https://www.mdpi.com/2071-1050/16/9/3784)
Supplement: s1 [file s1]

**Table S1.** Analytic table of cluster 1, hilly grasslands.

| ID PLOT                                                                                                          | 22  | 20  | 30 | 13  | 15 |
|------------------------------------------------------------------------------------------------------------------|-----|-----|----|-----|----|
| Aspect (°)                                                                                                       | 180 | 135 | 0  | 315 | 45 |
| Slope (°)                                                                                                        | 30  | 20  | 0  | 20  | 15 |
| Total vegetation cover (%)                                                                                       | 50  | 40  | 40 | 70  | 60 |
| Species richness                                                                                                 | 24  | 16  | 17 | 22  | 14 |
| <b><i>Artemisietalia iranica tragacantha</i> Zohary 1973</b>                                                     |     |     |    |     |    |
| <i>Launaea acanthodes</i> (Boiss.) Kuntze                                                                        |     | 1   | 2  | 2   | 3  |
| <i>Helichrysum leucocephalum</i> Boiss.                                                                          | 1   | 3   | 2  | +   |    |
| <i>Stipa barbata</i> Desf.                                                                                       | +   |     | 1  |     | 2  |
| <i>Astragalus fasciculifolius</i> Boiss.                                                                         | 3   |     |    |     |    |
| <i>Astragalus cemerinus</i> Beck                                                                                 |     | +   |    | 2   |    |
| <i>Noaea mucronata</i> (Forssk.) Asch. & Schweinf.                                                               | +   |     |    | 1   | +  |
| <i>Lomelosia olivieri</i> (Coult.) Greuter & Burdet                                                              | +   |     |    | +   | +  |
| <i>Salvia macrosiphon</i> Boiss.                                                                                 |     | +   |    |     | +  |
| <i>Acantholimon serotinum</i> Rech.f. & Schiman-Czeika                                                           |     |     | +  |     |    |
| <i>Centaurea balsamita</i> subsp. <i>kermanensis</i> (Bornm.) Wagenitz                                           | +   |     |    |     |    |
| <i>Centaurea bruguierana</i> subsp. <i>belangeriana</i> (DC.) Bornm.                                             |     |     | +  |     |    |
| <i>Cousinia nekarmanica</i> Rech.f.                                                                              | +   |     |    |     |    |
| <i>Phlomis orientalis</i> Mill.                                                                                  |     |     |    |     | +  |
| <i>Phlomis persica</i> Boiss.                                                                                    |     |     | +  |     |    |
| <i>Picris strigosa</i> M.Bieb.                                                                                   | +   |     |    |     |    |
| <i>Pimpinella aurea</i> DC.                                                                                      |     | +   |    |     |    |
| <i>Silene sisianica</i> Boiss. & Buhse                                                                           |     |     |    | +   |    |
| <b><i>Artemisietalia iranica typica</i> Zohary 1973 and <i>Artemisietea herbae-albae iranica</i> Zohary 1973</b> |     |     |    |     |    |
| <i>Dianthus crinitus</i> subsp. <i>kermanensis</i> Rech.fil                                                      | 1   | 1   | 2  | +   |    |
| <i>Taeniatherum caput-medusae</i> (L.) Nevski                                                                    |     | +   | 2  | +   | 1  |
| <i>Boissieria squarrosa</i> (Banks & Sol.) Nevski                                                                | +   | +   |    | +   | +  |
| <i>Diarthron lessertii</i> (Wikstr.) Kit Tan                                                                     | 1   |     |    |     |    |
| <i>Crupina vulgaris</i> Pers. ex Cass.                                                                           |     |     |    | +   |    |
| <i>Euphorbia dracunculoides</i> Lam.                                                                             | +   |     |    |     |    |
| <i>Stipa hohenackeriana</i> Trin. & Rupr.                                                                        |     |     |    | +   |    |
| <b><i>Astragaletea iranica</i> Zohary 1973</b>                                                                   |     |     |    |     |    |
| <i>Onosma microcarpum</i> DC.                                                                                    |     |     |    | +   | +  |
| <i>Allium sphaerocephalon</i> L.                                                                                 | +   |     |    |     |    |
| <b><i>Secalion cereale segetale</i> Zohary 1973 and <i>Hulthemion persicae segetale</i> Zohary 1973</b>          |     |     |    |     |    |
| <i>Medicago monantha</i> (C.A.Mey.) Trautv.                                                                      |     | +   |    |     |    |
| <i>Medicago persica</i> (Boiss.) E.Small                                                                         |     | +   |    |     |    |
| <i>Sisymbrium irio</i> L.                                                                                        |     |     |    | +   |    |
| <i>Zoegea leptaurea</i> L.                                                                                       |     | +   | +  | +   |    |
| <i>Convolvulus argyranthus</i> Rech. f., Aellen & Esfand.                                                        | +   |     | +  |     |    |
| <i>Glycyrrhiza glabra</i> L.                                                                                     |     |     |    | 1   |    |
| <i>Lactuca serriola</i> L.                                                                                       |     |     | +  |     |    |
| <i>Bromus tectorum</i> L.                                                                                        | +   |     |    | +   |    |
| <i>Carthamus oxyacantha</i> M.Bieb.                                                                              |     |     |    |     | +  |
| <b><i>Tricetalia iranica</i> Zohary 1973 and <i>Secalinetea orientalia</i> Zohary 1973</b>                       |     |     |    |     |    |

|                                           |   |   |   |   |   |
|-------------------------------------------|---|---|---|---|---|
| <i>Gundelia tournefortii</i> L.           | + | 1 | + | + |   |
| <i>Camelina hispida</i> Boiss.            |   |   | + |   |   |
| <i>Lepidium draba</i> L.                  |   |   |   |   | + |
| <b><i>Chenopodietea</i> Oberd. (1957)</b> |   |   |   |   |   |
| <i>Onopordum leptolepis</i> DC.           | + |   | + |   | + |
| <i>Cyanus depressus</i> (M.Bieb.) Soják   | + | + |   |   |   |
| <i>Cynodon dactylon</i> (L.) Pers.        | + |   |   |   |   |
| <b>Companions</b>                         |   |   |   |   |   |
| <i>Festuca arundinacea</i> Schreb.        |   |   | 1 | 3 | + |
| <i>Marrubium crassidens</i> Boiss.        |   |   |   |   | 3 |
| <i>Chardinia orientalis</i> (L.) Kuntze   | 1 | + |   | + |   |
| <i>Agrostis gigantea</i> Roth             | + |   |   |   | + |
| <i>Filago pyramidata</i> L.               |   |   | + | + |   |
| <i>Chardinia orientalis</i> (L.) Kuntze   | + |   |   |   |   |
| <i>Hordeum vulgare</i> L.                 |   |   | + |   |   |
| <i>Moltkia gypsacea</i> Rech.f. & Aellen  | + |   |   |   |   |
| <i>Nigella oxypetala</i> Boiss.           |   | + |   |   |   |
| <i>Nonea caspica</i> (Willd.) G.Don       |   | + |   |   |   |
| <i>Prunus arabica</i> (Olivier) Meikle    |   |   |   | + |   |
| <i>Siebera nana</i> (DC.) Bornm.          | + |   |   |   |   |

**Table S2.** Analytic table of cluster 2, grasslands dominated by *Stipa barbata* Desf.

| ID PLOT                                                                                                                                             | 21 | 19 | 27 | 9  | 8  |
|-----------------------------------------------------------------------------------------------------------------------------------------------------|----|----|----|----|----|
| Aspect (°)                                                                                                                                          | 0  | 0  | 0  | 0  | 45 |
| Slope (°)                                                                                                                                           | 0  | 0  | 0  | 0  | 5  |
| Total vegetation cover (%)                                                                                                                          | 30 | 40 | 40 | 30 | 30 |
| Species richness                                                                                                                                    | 22 | 13 | 10 | 16 | 15 |
| <b><i>Artemisietalia iranica tragacantha</i> Zohary 1973</b>                                                                                        |    |    |    |    |    |
| <i>Stipa barbata</i> Desf.                                                                                                                          | 4  | 3  | 3  | 3  | 4  |
| <i>Hertia angustifolia</i> (DC.) Kuntze                                                                                                             |    |    |    | +  | 2  |
| <i>Astragalus cancellatus</i> Bunge                                                                                                                 | +  | +  | +  |    |    |
| <i>Launaea acanthodes</i> (Boiss.) Kuntze                                                                                                           | 1  | +  |    |    |    |
| <i>Centaurea balsamita</i> subsp. <i>kermanensis</i> (Bornm.) Wagenitz                                                                              |    |    |    | +  | +  |
| <i>Phlomis aucheri</i> Boiss.                                                                                                                       | +  |    |    | +  |    |
| <i>Astragalus borraginaceus</i> Rech.f.                                                                                                             |    |    | +  |    |    |
| <i>Astragalus cemerinus</i> Beck                                                                                                                    |    |    |    |    | +  |
| <i>Lomelosia olivieri</i> (Coul.) Greuter & Burdet                                                                                                  | +  |    |    |    |    |
| <i>Noaea mucronata</i> (Forssk.) Asch. & Schweinf.                                                                                                  | +  |    |    |    |    |
| <i>Peganum harmala</i> L.                                                                                                                           | +  |    |    |    |    |
| <i>Salvia macrosiphon</i> Boiss.                                                                                                                    |    | +  |    |    |    |
| <i>Senecio glaucus</i> L.                                                                                                                           | +  |    |    |    |    |
| <i>Stachys inflata</i> Benth.                                                                                                                       | +  |    |    |    |    |
| <b><i>Artemisietalia iranica typica</i> Zohary 1973 and <i>Artemisietea herbae-albae iranica</i> Zohary 1973</b>                                    |    |    |    |    |    |
| <i>Bellevaia saviczii</i> Woronow                                                                                                                   |    | +  | +  | +  | +  |
| <i>Euphorbia dracunculoides</i> Lam.                                                                                                                |    |    | +  | +  | +  |
| <i>Stipa hohenackeriana</i> Trin. & Rupr.                                                                                                           | +  | +  |    |    |    |
| <i>Taeniatherum caput-medusae</i> (L.) Nevski                                                                                                       | +  |    |    | +  |    |
| <i>Boissieria squarrosa</i> (Banks & Sol.) Nevski                                                                                                   | +  |    |    |    |    |
| <i>Lactuca orientalis</i> (Boiss.) Boiss.                                                                                                           |    |    |    |    | +  |
| <b><i>Secalion cereale segetale</i> Zohary 1973 and <i>Tricetalia iranica</i> Zohary 1973</b>                                                       |    |    |    |    |    |
| <i>Glycyrrhiza glabra</i> L.                                                                                                                        |    | 1  | 1  | 1  | 1  |
| <i>Alcea kurdica</i> Alef.                                                                                                                          |    | +  | +  | +  |    |
| <i>Zoegea lept aurea</i> L.                                                                                                                         | +  |    |    | +  | +  |
| <i>Medicago sativa</i> L.                                                                                                                           |    | +  |    |    | +  |
| <i>Medicago monantha</i> (C.A.Mey.) Trautv.                                                                                                         | +  |    |    |    |    |
| <i>Medicago persica</i> (Boiss.) E.Small                                                                                                            | +  |    |    |    |    |
| <i>Reseda lutea</i> L.                                                                                                                              |    | +  |    |    |    |
| <i>Bromus tectorum</i> L.                                                                                                                           | +  |    |    |    |    |
| <i>Gundelia tournefortii</i> L.                                                                                                                     | +  |    |    |    |    |
| <b><i>Prosopidion farctae segetale</i> Zohary 1973, <i>Triticetalia orientalia</i> Zohary 1949-50 and <i>Secalinetea orientalia</i> Zohary 1973</b> |    |    |    |    |    |
| <i>Alhagi maurorum</i> Medik.                                                                                                                       |    | 1  | 1  | 1  | 1  |
| <i>Alhagi pseudalhagi</i> (M. Bieb.) Desv. ex B. Keller & Shap.                                                                                     |    |    |    |    | 1  |
| <b><i>Chenopodietea</i> Oberd. (1957)</b>                                                                                                           |    |    |    |    |    |
| <i>Chardinia orientalis</i> (L.) Kuntze                                                                                                             | +  |    |    |    |    |
| <i>Cynodon dactylon</i> (L.) Pers.                                                                                                                  |    | +  |    |    |    |

|                                                |   |   |   |   |   |
|------------------------------------------------|---|---|---|---|---|
| <i>Onopordum leptolepis</i> DC.                | + |   |   |   |   |
| <b>Companions</b>                              |   |   |   |   |   |
| <i>Nigella oxypetala</i> Boiss.                | + |   | + | + |   |
| <i>Marrubium vulgare</i> L.                    |   |   |   |   | 1 |
| <i>Siebera nana</i> (DC.) Bornm.               | 1 |   |   |   |   |
| <i>Eremopyrum bonaepartis</i> (Spreng.) Nevski |   |   |   | + |   |
| <i>Festuca arundinacea</i> Schreb.             |   |   |   |   | + |
| <i>Leopoldia tenuiflora</i> (Tausch) Heldr.    | + |   |   |   |   |
| <i>Minuartia meyeri</i> (Boiss.) Bornm.        |   |   |   | + |   |
| <i>Rhaponticum repens</i> (L.) Hidalgo         |   |   |   | + |   |
| <i>Achillea vermicularis</i> Trin.             |   | + | + | + | + |

**Table S3.** Analytic table of cluster 3, shrublands dominated by *Alhagi maurorum* Medik.

| ID PLOT                                                                                                                                  | 26 | 31 | 10 | 24 | 28 |
|------------------------------------------------------------------------------------------------------------------------------------------|----|----|----|----|----|
| Aspect (°)                                                                                                                               | 0  | 0  | 0  | 0  | 0  |
| Slope (°)                                                                                                                                | 0  | 0  | 0  | 0  | 0  |
| Total vegetation cover (%)                                                                                                               | 70 | 60 | 30 | 95 | 70 |
| Species richness                                                                                                                         | 21 | 16 | 17 | 14 | 16 |
| <b><i>Prosopidion farctae segetale</i> Zohary 1973 and <i>Triticetalia orientalia</i> Zohary 1949-50</b>                                 |    |    |    |    |    |
| <i>Alhagi maurorum</i> Medik                                                                                                             | 4  | 3  | 3  | 5  | 4  |
| <i>Alhagi pseudalhagi</i> (M. Bieb.) Desv. ex B. Keller & Shap.                                                                          | 1  | 1  |    |    |    |
| <i>Centaurea solstitialis</i> L.                                                                                                         |    |    |    | +  |    |
| <i>Falcaria vulgaris</i> Bernh.                                                                                                          |    | +  |    |    |    |
| <b><i>Secalium cereale segetale</i> Zohary 1973, <i>Trisetalia iranica</i> Zohary 1973 and <i>Secalinetea orientalia</i> Zohary 1973</b> |    |    |    |    |    |
| <i>Glycyrrhiza glabra</i> L.                                                                                                             | 2  | +  | +  | +  | 1  |
| <i>Lactuca serriola</i> L.                                                                                                               | +  |    | +  | 1  | +  |
| <i>Hyoscyamus reticulatus</i> L.                                                                                                         |    | +  |    |    | +  |
| <i>Medicago sativa</i> L.                                                                                                                |    |    | +  |    | +  |
| <i>Zoegea lept aurea</i> L.                                                                                                              |    | +  |    |    | +  |
| <i>Alcea kurdica</i> Alef.                                                                                                               |    | +  |    |    |    |
| <i>Consolida orientalis</i> (J.Gay) Schrödinger                                                                                          | +  |    |    |    |    |
| <i>Medicago monantha</i> (C.A.Mey.) Trautv.                                                                                              |    |    | +  |    |    |
| <i>Taeniatherum caput-medusae</i> (L.) Nevski                                                                                            |    |    | +  |    | +  |
| <b><i>Chenopodietea</i> Oberd. (1957)</b>                                                                                                |    |    |    |    |    |
| <i>Hordeum murinum</i> subsp. <i>glaucum</i> (Steud.)                                                                                    | 1  | +  | 2  | 1  | +  |
| <i>Onopordum leptolepis</i> DC.                                                                                                          | +  | +  | +  | +  |    |
| <i>Cyanus depressus</i> (M.Bieb.) Soják                                                                                                  |    | +  |    | 1  |    |
| <i>Convolvulus arvensis</i> L.                                                                                                           |    | +  | +  |    |    |
| <i>Tragopogon collinus</i> DC                                                                                                            | +  |    |    | +  |    |
| <i>Cynodon dactylon</i> (L.) Pers.                                                                                                       |    | +  |    |    | +  |
| <i>Erodium cicutarium</i> (L.) L'Hér.                                                                                                    |    |    |    | 1  |    |
| <i>Chardinia orientalis</i> (L.) Kuntze                                                                                                  | +  |    |    |    |    |
| <b><i>Artemisietalia iranica typica</i> Zohary 1973</b>                                                                                  |    |    |    |    |    |
| <i>Euphorbia dracunculoides</i> Lam.                                                                                                     | 1  | 1  | 1  |    |    |
| <i>Aegilops tauschii</i> Coss.                                                                                                           |    |    |    |    | 3  |
| <i>Boissieria squarrosa</i> (Banks & Sol.) Nevski                                                                                        | +  | +  | +  |    | +  |
| <i>Eryngium billardieri</i> Delile                                                                                                       |    |    |    | +  |    |
| <i>Bellevalia saviczii</i> Woronow                                                                                                       |    |    | +  |    | +  |
| <b><i>Artemisietalia iranica tragacantha</i> Zohary 1973 and <i>Artemisietea herbae-albae iranica</i> Zohary 1973</b>                    |    |    |    |    |    |
| <i>Astragalus cancellatus</i> Bunge                                                                                                      | +  |    | 1  |    | +  |
| <i>Astragalus borraginaceus</i> Rech.f.                                                                                                  | +  |    |    |    | +  |
| <i>Centaurea balsamita</i> subsp. <i>kermanensis</i> (Bornm.) Wagenitz                                                                   | +  |    |    | +  |    |
| <i>Launaea acanthodes</i> (Boiss.) Kuntze                                                                                                | +  |    |    |    | +  |
| <i>Peganum harmala</i> L.                                                                                                                |    |    |    | +  |    |
| <i>Senecio glaucus</i> L.                                                                                                                | +  |    |    |    |    |
| <i>Stipa barbata</i> Desf.                                                                                                               |    |    | +  |    |    |
| <b>Companions</b>                                                                                                                        |    |    |    |    |    |
| <i>Eremopyrum bonaepartis</i> (Spreng.) Nevski                                                                                           | +  | +  | +  |    |    |

|                                                                |   |   |   |   |   |
|----------------------------------------------------------------|---|---|---|---|---|
| <i>Nigella oxypetala</i> Boiss.                                | + |   | 1 |   |   |
| <i>Crepis sancta</i> subsp. <i>nemausensis</i> (P.Fourn.) Bab. | + |   |   |   |   |
| <i>Descurainia sophia</i> (L.) Webb ex Prantl                  |   |   |   | + |   |
| <i>Hordeum spontaneum</i> K.Koch                               | + |   |   |   |   |
| <i>Solanum villosum</i> Mill. (heterotypic synonym)            | + |   |   |   |   |
| <i>Bromus tectorum</i> L.                                      |   | + |   | 1 |   |
| <i>Achillea vermicularis</i> Trin.                             | + |   | + |   | + |

**Table S4.** Analytic table of clusters 4-5, respectively, grasslands dominated by *Bellevalia saviczii* Woronow and grasslands dominated by *Glycyrrhiza glabra* L.

| ID PLOT                                                                                                                                        | 14 | 12 | 29 | 32 | 11 | 5  | 4  | 33 | 7  | 6  |
|------------------------------------------------------------------------------------------------------------------------------------------------|----|----|----|----|----|----|----|----|----|----|
| Aspect (°)                                                                                                                                     | 0  | 0  | 0  | 0  | 0  | 0  | 0  | 0  | 0  | 0  |
| Slope (°)                                                                                                                                      | 0  | 0  | 0  | 0  | 0  | 0  | 0  | 0  | 0  | 0  |
| Total vegetation cover (%)                                                                                                                     | 10 | 10 | 10 | 10 | 10 | 40 | 50 | 50 | 35 | 70 |
| Species richness                                                                                                                               | 24 | 20 | 21 | 19 | 14 | 18 | 16 | 15 | 17 | 12 |
| <b><i>Artemisietalia iranica typica</i> Zohary 1973</b>                                                                                        |    |    |    |    |    |    |    |    |    |    |
| <i>Bellevalia saviczii</i> Woronow                                                                                                             | 2  | 2  | 2  | 2  | 2  | 1  | +  | 1  | 1  |    |
| <i>Boissieria squarrosa</i> (Banks & Sol.) Nevski                                                                                              | +  |    | +  | +  | +  |    |    |    |    |    |
| <i>Bellevalia glauca</i> (Lindl.) Kunth                                                                                                        |    | +  | +  |    |    |    |    |    |    |    |
| <i>Euphorbia dracunculoides</i> Lam.                                                                                                           |    | +  |    |    |    |    |    |    |    |    |
| <i>Taeniatherum caput-medusae</i> (L.) Nevski                                                                                                  | +  | +  |    | +  | +  | 1  |    | +  |    |    |
| <i>Aegilops crassa</i> Boiss.                                                                                                                  | +  |    |    |    |    |    |    |    | +  |    |
| <i>Aegilops tauschii</i> Coss.                                                                                                                 |    |    |    |    |    |    |    |    | +  |    |
| <b><i>Artemisietalia iranica tragacantha</i> Zohary 1973 and <i>Artemisietea herbae-albae iranica</i> Zohary 1973</b>                          |    |    |    |    |    |    |    |    |    |    |
| <i>Launaea acanthodes</i> (Boiss.) Kuntze                                                                                                      | +  | +  | +  | +  | +  |    |    |    |    |    |
| <i>Centaurea bruguierana</i> subsp. <i>belangeriana</i> (DC.) Bornm.                                                                           | +  | +  | +  | +  |    |    |    |    |    |    |
| <i>Astragalus cancellatus</i> Bunge                                                                                                            |    |    | +  | +  | +  |    |    |    |    |    |
| <i>Cousinia gracilis</i> Boiss.                                                                                                                | +  | +  |    |    |    |    |    |    |    |    |
| <i>Lomelosia olivieri</i> (Coul.) Greuter & Burdet                                                                                             |    | +  |    | +  |    |    |    |    |    |    |
| <i>Noaea mucronata</i> (Forssk.) Asch. & Schweinf.                                                                                             |    |    | +  |    | +  |    |    |    |    |    |
| <i>Picris strigosa</i> M.Bieb.                                                                                                                 |    | +  |    | +  |    |    |    |    |    |    |
| <i>Centaurea calcitrapa</i> L.                                                                                                                 |    |    | +  |    |    |    |    |    |    |    |
| <i>Phlomis orientalis</i> Mill.                                                                                                                | +  |    |    |    |    |    |    |    |    |    |
| <i>Medicago sativa</i> L.                                                                                                                      | +  |    | +  | +  |    |    |    |    |    |    |
| <i>Stipa barbata</i> Desf.                                                                                                                     | +  |    |    |    |    |    |    |    |    |    |
| <i>Salvia macrosiphon</i> Boiss.                                                                                                               | +  |    |    |    |    |    | 1  | 1  |    | +  |
| <i>Cousinia leptomera</i> Rech.f.                                                                                                              |    |    |    |    |    |    |    |    | +  |    |
| <i>Reseda alba</i> L.                                                                                                                          |    |    |    |    |    | +  |    |    |    |    |
| <b><i>Astragaletea iranica</i> Zohary 1973</b>                                                                                                 |    |    |    |    |    |    |    |    |    |    |
| <i>Allium sphaerocephalon</i> L.                                                                                                               | +  |    | +  |    | +  | +  | +  | +  | +  |    |
| <i>Achillea vermicularis</i> Trin.                                                                                                             | 1  | +  | +  | +  | +  | +  | +  | +  | +  | +  |
| <b><i>Secalion cereale segetale</i> Zohary 1973, <i>Hulthemion persicae segetale</i> Zohary 1973 and <i>Tricetalia iranica</i> Zohary 1973</b> |    |    |    |    |    |    |    |    |    |    |
| <i>Glycyrrhiza glabra</i> L.                                                                                                                   |    | +  | 1  | +  | +  | 2  | 3  | 3  | 3  | 3  |
| <i>Hyoscyamus reticulatus</i> L.                                                                                                               |    |    | +  | +  | +  |    |    | +  | +  | +  |
| <i>Lactuca serriola</i> L.                                                                                                                     |    | +  |    |    |    | +  | +  |    |    | +  |
| <i>Medicago monantha</i> (C.A.Mey.) Trautv.                                                                                                    |    | +  |    |    |    |    |    | +  | +  | +  |
| <i>Sisymbrium irio</i> L.                                                                                                                      |    |    | +  |    |    | +  |    |    | +  |    |
| <i>Consolida orientalis</i> (J.Gay) Schrödinger                                                                                                |    |    |    |    |    | +  | +  | +  |    |    |
| <i>Zoegea lept aurea</i> L.                                                                                                                    |    |    |    |    |    |    | +  |    | +  |    |
| <i>Matthiola chenopodiifolia</i> Fisch. & C.A. Mey.                                                                                            |    |    |    |    |    |    | +  |    |    |    |
| <i>Sisymbrium irio</i> L.                                                                                                                      |    |    |    |    |    | +  |    |    |    |    |
| <i>Koelpinia linearis</i> Pall.                                                                                                                | +  | +  |    |    |    |    |    |    |    |    |
| <i>Valerianella szovitsiana</i> Fisch. & C.A. Mey.                                                                                             |    |    |    |    |    |    | +  | +  | +  |    |
| <i>Tragopogon graminifolius</i> DC.                                                                                                            |    |    |    |    |    |    | +  |    |    | +  |

[illegible]



**Table S5.** Analytic table of clusters 6-7, respectively, ruderal vegetation of the ancient Persian garden canals and grasslands dominated by *Hordeum murinum* L.

| ID PLOT                                                                                                                              | 17 | 18 | 16 | 1  | 2  | 23 | 25 | 3  |
|--------------------------------------------------------------------------------------------------------------------------------------|----|----|----|----|----|----|----|----|
| Aspect (°)                                                                                                                           | 0  | 0  | 0  | 0  | 0  | 0  | 0  | 0  |
| Slope (°)                                                                                                                            | 0  | 0  | 0  | 0  | 0  | 0  | 0  | 0  |
| Total vegetation cover (%)                                                                                                           | 30 | 20 | 10 | 60 | 95 | 90 | 50 | 60 |
| Species richness                                                                                                                     | 15 | 22 | 17 | 34 | 21 | 29 | 21 | 13 |
| <i>Prosopidion farctae segetale</i> Zohary 1973 and <i>Triticetalia orientalia</i> Zohary 1949-50                                    |    |    |    |    |    |    |    |    |
| <i>Alhagi maurorum</i> Medik.                                                                                                        | +  |    |    |    |    |    |    |    |
| <i>Centaurea solstitialis</i> L.                                                                                                     |    |    |    | +  | 1  | 1  |    |    |
| <i>Falcaria vulgaris</i> Bernh.                                                                                                      | +  |    |    | +  |    | +  | +  | +  |
| <i>Gypsophila pilosa</i> Huds.                                                                                                       |    |    |    | +  | +  |    |    |    |
| <i>Alhagi pseudalhagi</i> (M. Bieb.) Desv. ex B. Keller & Shap.                                                                      | +  |    |    | +  |    |    |    |    |
| <i>Secalion cereale segetale</i> Zohary 1973                                                                                         |    |    |    |    |    |    |    |    |
| <i>Glycyrrhiza glabra</i> L.                                                                                                         | 2  | 2  | 1  | 3  |    | +  | 2  | 1  |
| <i>Medicago persica</i> (Boiss.) E.Small                                                                                             | +  | +  |    | +  |    |    |    |    |
| <i>Anchusa azurea</i> Mill.                                                                                                          | +  |    |    |    |    |    |    |    |
| <i>Medicago monantha</i> (C.A.Mey.) Trautv.                                                                                          | +  |    |    |    |    |    |    |    |
| <i>Lactuca serriola</i> L.                                                                                                           | +  |    | +  | 1  | +  | 1  | +  | +  |
| <i>Zoegea lept aurea</i> L.                                                                                                          |    |    |    |    |    | +  | +  |    |
| <i>Turgenia latifolia</i> (L.) Hoffm.                                                                                                |    |    |    | +  | +  |    |    |    |
| <i>Sisymbrium irio</i> L.                                                                                                            |    |    |    | +  | +  |    |    |    |
| <i>Galium tricornutum</i> Dandy                                                                                                      |    |    |    |    |    | 1  |    |    |
| <i>Consolida orientalis</i> (J.Gay) Schrödinger                                                                                      |    |    |    |    |    |    |    |    |
| <i>Centaurea virgata</i> subsp. <i>squarrosa</i> (Boiss.) Gugler                                                                     | +  |    |    | 1  |    |    |    |    |
| <i>Lepidium draba</i> L.                                                                                                             | +  |    |    |    |    |    |    |    |
| <i>Camelina hispida</i> Boiss.                                                                                                       |    |    |    | +  | +  |    |    |    |
| <i>Hulthemion persicae segetale</i> Zohary 1973, <i>Tricetalia iranica</i> Zohary 1973 and <i>Secalinetea orientalia</i> Zohary 1973 |    |    |    |    |    |    |    |    |
| <i>Papaver argemone</i> L.                                                                                                           |    |    |    | +  | +  | +  |    |    |
| <i>Carthamus oxyacantha</i> M.Bieb.                                                                                                  |    |    |    | +  |    |    |    | +  |
| <i>Koelpinia linearis</i> Pall.                                                                                                      |    |    |    | +  |    |    |    |    |
| <i>Bromus tectorum</i> L.                                                                                                            | +  | +  | +  | +  | 1  | +  |    |    |
| <i>Artemisietalia iranica tragacantha</i> Zohary 1973                                                                                |    |    |    |    |    |    |    |    |
| <i>Launaea acanthodes</i> (Boiss.) Kuntze                                                                                            | 1  | +  | 1  | 1  | +  |    | +  |    |
| <i>Astragalus cancellatus</i> Bunge                                                                                                  | +  | +  | +  | +  |    | +  |    |    |
| <i>Phlomis persica</i> Boiss.                                                                                                        | +  |    | +  |    |    |    |    |    |
| <i>Picris strigosa</i> M.Bieb.                                                                                                       | +  |    |    |    |    |    |    |    |
| <i>Medicago sativa</i> L.                                                                                                            | +  |    |    | 2  | +  | +  | 1  |    |
| <i>Senecio glaucus</i> L.                                                                                                            |    |    |    | +  | +  | +  | +  |    |
| <i>Zosima absinthifolia</i> Link                                                                                                     |    |    |    | +  | 1  |    |    |    |
| <i>Salvia macrosiphon</i> Boiss.                                                                                                     |    |    |    | +  | +  |    |    |    |
| <i>Noaea mucronata</i> (Forssk.) Asch. & Schweinf.                                                                                   |    |    |    | +  |    |    |    | +  |
| <i>Reseda alba</i> L.                                                                                                                |    |    |    | +  |    |    |    |    |
| <i>Polygonum hyrcanicum</i> Rech.f.                                                                                                  |    |    |    | +  |    |    |    |    |
| <i>Pimpinella aurea</i> DC.                                                                                                          |    |    |    |    |    | +  |    |    |
| <i>Centaurea balsamita</i> subsp. <i>kermanensis</i> (Bornm.) Wagenitz                                                               |    |    |    |    |    | +  |    |    |

|                                                                                                                  |   |   |   |   |   |   |   |   |
|------------------------------------------------------------------------------------------------------------------|---|---|---|---|---|---|---|---|
| <i>Centaurea bruguierana</i> subsp. <i>belangeriana</i> (DC.) Bornm.                                             |   |   | + |   |   |   |   |   |
| <i>Stipa barbata</i> Desf.                                                                                       | + |   |   |   | + |   |   |   |
| <b><i>Artemisietalia iranica typica</i> Zohary 1973 and <i>Artemisietea herbae-albae iranica</i> Zohary 1973</b> |   |   |   |   |   |   |   |   |
| <i>Euphorbia dracunculoides</i> Lam.                                                                             | 1 | + |   |   |   |   |   |   |
| <i>Aegilops crassa</i> Boiss.                                                                                    |   | + |   |   |   |   |   |   |
| <i>Euphorbia sororia</i> Schrenk                                                                                 | + |   |   |   |   |   |   |   |
| <i>Stipa lessingiana</i> Trin. & Rupr.                                                                           |   | + |   |   |   |   |   |   |
| <i>Boissieria squarrosa</i> (Banks & Sol.) Nevski                                                                | + | + | + | + |   | + | + | + |
| <i>Lactuca orientalis</i> (Boiss.) Boiss.                                                                        |   |   |   |   | 1 |   |   |   |
| <i>Taeniatherum caput-medusae</i> (L.) Nevski                                                                    |   |   |   |   | + |   |   |   |
| <i>Crupina vulgaris</i> Pers. ex Cass.                                                                           |   |   |   |   |   | + |   |   |
| <i>Bellevalia saviczii</i> Woronow                                                                               |   | + |   |   |   |   | + | 3 |
| <b><i>Astragaletea iranica</i> Zohary 1973</b>                                                                   |   |   |   |   |   |   |   |   |
| <i>Allium sphaerocephalon</i> L.                                                                                 |   |   |   |   |   | + | + | + |
| <i>Achillea vermicularis</i> Trin.                                                                               | + |   |   |   |   |   | + | + |
| <b><i>Chenopodietea</i> Oberd. (1957)</b>                                                                        |   |   |   |   |   |   |   |   |
| <i>Hordeum murinum</i> subsp. <i>glaucum</i> (Steud.)                                                            | 1 | 1 | + | 3 | 3 | 5 | 4 | 4 |
| <i>Cyanus depressus</i> (M.Bieb.) Soják                                                                          |   | + | + | 1 | + | 1 | 1 | 1 |
| <i>Cynodon dactylon</i> (L.) Pers.                                                                               |   | 1 |   |   |   | + |   |   |
| <i>Convolvulus arvensis</i> L.                                                                                   | + | + | 1 |   |   |   |   |   |
| <i>Tragopogon collinus</i> DC                                                                                    | 1 | 1 |   |   |   |   |   |   |
| <i>Erodium cicutarium</i> (L.) L'Hér.                                                                            |   |   |   | + |   | + |   |   |
| <i>Chardinia orientalis</i> (L.) Kuntze                                                                          |   |   |   |   |   | + |   |   |
| <i>Onopordum leptolepis</i> DC.                                                                                  |   | + |   | + | + | + | + |   |
| <b>Companions</b>                                                                                                |   |   |   |   |   |   |   |   |
| <i>Zeravschania membranacea</i> (Boiss.) Pimenov                                                                 |   |   | + |   |   |   |   |   |
| <i>Eremopyrum bonaepartis</i> (Spreng.) Nevski                                                                   | + | + |   |   |   |   | + | + |
| <i>Tragopogon porrifolius</i> subsp. <i>longirostris</i> (Sch.Bip.) Greuter                                      |   |   | 1 |   |   | + |   | + |
| <i>Nonea caspica</i> (Willd.) G.Don                                                                              |   |   |   | + |   | + |   |   |
| <i>Nigella oxypetala</i> Boiss.                                                                                  |   |   |   | + |   | + |   |   |
| <i>Marrubium crassidens</i> Boiss.                                                                               |   |   |   | + | + |   |   |   |
| <i>Garhadiolus hedypnois</i> Jaub. & Spach                                                                       |   |   |   | + | + |   |   |   |
| <i>Festuca arundinacea</i> Schreb.                                                                               |   |   |   |   | 1 |   |   |   |
| <i>Descurainia sophia</i> (L.) Webb ex Prantl                                                                    |   |   |   | + |   |   | + |   |
| <i>Crepis sancta</i> subsp. <i>nemausensis</i> (P.Fourn.) Babc.                                                  |   |   |   |   |   | + | + |   |
| <i>Chorispota tenella</i> (Pall.) DC.                                                                            |   |   |   | + | + |   |   |   |
| <i>Chardinia orientalis</i> (L.) Kuntze                                                                          |   |   |   | + | + |   |   |   |
| <i>Hordeum spontaneum</i> K.Koch                                                                                 |   |   |   |   |   | + |   |   |
